# Supplementary material
Source: PubMed Central journal article supplement (PMC8373029)
Supplement: jcm.01231-21-s0001.pdf [file jcm.01231-21-s0001.pdf]

1 **Supplemental Table 1: COVID-19 Convalescent Plasma Donor Cohort Demographics**  
2 **(N=44)**

---

|                                                     | Mean (SD) or ratio   |
|-----------------------------------------------------|----------------------|
| Age (years)                                         | 47 (15)              |
| Sex Ratio (M:F)                                     | 1:1                  |
| Symptom onset to first serum collection (days)      | 54 (17)              |
| Symptom onset to last serum collection (days)       | 105 (17)             |
| Time between first and last serum collection (days) | 52 (20)              |
| Symptom onset date range                            | 3/3/2020 to 5/4/2020 |

---

3

4

5 **Supplemental Table 2: Longitudinal Models**

|                                    | Estimate (95% CI)       | P value          |
|------------------------------------|-------------------------|------------------|
| <b>Abbott NC IgG CIA</b>           |                         |                  |
| Days from onset                    | -0.019 (-0.023, -0.016) | <b>&lt;0.001</b> |
| Intercept                          | 6.802 (6.147, 7.456)    | <b>&lt;0.001</b> |
| Random Intercept SD                | 1.952 (1.579, 2.425)    | -                |
| Residual SD                        | 0.405 (0.336, 0.491)    | -                |
| <b>Roche NC Total Ab ECLIA</b>     |                         |                  |
| Days from onset                    | 0.437 (0.305, 0.571)    | <b>&lt;0.001</b> |
| Intercept                          | 45.121 (30.674, 59.569) | <b>&lt;0.001</b> |
| Random Intercept SD                | 31.690 (24.767, 40.191) | -                |
| Residual SD                        | 16.676 (13.873, 20.167) | -                |
| <b>Roche RBD Total Ab ECLIA</b>    |                         |                  |
| Days from onset                    | 0.32 (0.02, 0.63)       | <b>0.036</b>     |
| Intercept                          | 135.88 (109.12, 162.64) | <b>&lt;0.001</b> |
| Random Intercept SD                | 73.29 (66.60, 80.65)    | -                |
| Residual SD                        | 26.47 (21.64, 32.39)    | -                |
| <b>Ortho S IgG CIA</b>             |                         |                  |
| Days from onset                    | -0.036 (-0.047, -0.025) | <b>&lt;0.001</b> |
| Intercept                          | 15.900 (13.953, 17.848) | <b>&lt;0.001</b> |
| Random Intercept SD                | 5.774 (4.663, 7.179)    | -                |
| Residual SD                        | 1.469 (1.234, 1.757)    | -                |
| <b>Euroimmun S1 IgG ELISA</b>      |                         |                  |
| Days from onset                    | -0.017 (-0.027, -0.008) | <b>&lt;0.001</b> |
| Intercept                          | 6.166 (5.171, 7.161)    | <b>&lt;0.001</b> |
| Random Intercept SD                | 2.043 (1.583, 2.602)    | -                |
| Residual SD                        | 1.274 (1.070, 1.523)    | -                |
| <b>Genscript cPASS nAb</b>         |                         |                  |
| Days from onset                    | -0.001 (-0.002, -0.001) | <b>&lt;0.001</b> |
| Intercept                          | 0.828 (0.760, 0.897)    | <b>&lt;0.001</b> |
| Random Intercept SD                | 0.149 (0.116, 0.188)    | -                |
| Residual SD                        | 0.083 (0.070, 0.100)    | -                |
| <b>Mayo Clinic nAb<sup>b</sup></b> |                         |                  |
| Days from onset                    | -0.014 (-0.020, -0.008) | <b>&lt;0.001</b> |
| Intercept                          | 9.097 (8.520, 9.672)    | <b>&lt;0.001</b> |
| Random Intercept SD                | 1.095 (0.840, 1.403)    | -                |
| Residual SD                        | 0.767 (0.645, 0.916)    | -                |
| <b>NeuCovix-HT nAb</b>             |                         |                  |
| Days from onset                    | -0.06 (-0.10, -0.03)    | <b>&lt;0.001</b> |
| Intercept                          | 11.02 (7.93, 14.11)     | <b>&lt;0.001</b> |
| Random Intercept SD                | 6.09 (5.13, 7.23)       | -                |
| Residual SD                        | 3.46 (3.02, 3.96)       | -                |

6 <sup>a</sup>Two-sided p-values are reported with no correction for multiple testing.

7 <sup>b</sup>Mayo Clinic nAb was analyzed on the log<sub>2</sub> scale.

8
